# Supplementary material for: E3 Ubiquitin Ligase Uhrf2 Knockout Reveals a Critical Role in Social Behavior and Synaptic Plasticity in the Hippocampus
Source: MDPI journal article supplement (doi:10.3390/ijms25031543), 2024-01-26
Supplement: s1 [file s1]

## Supplemental Data

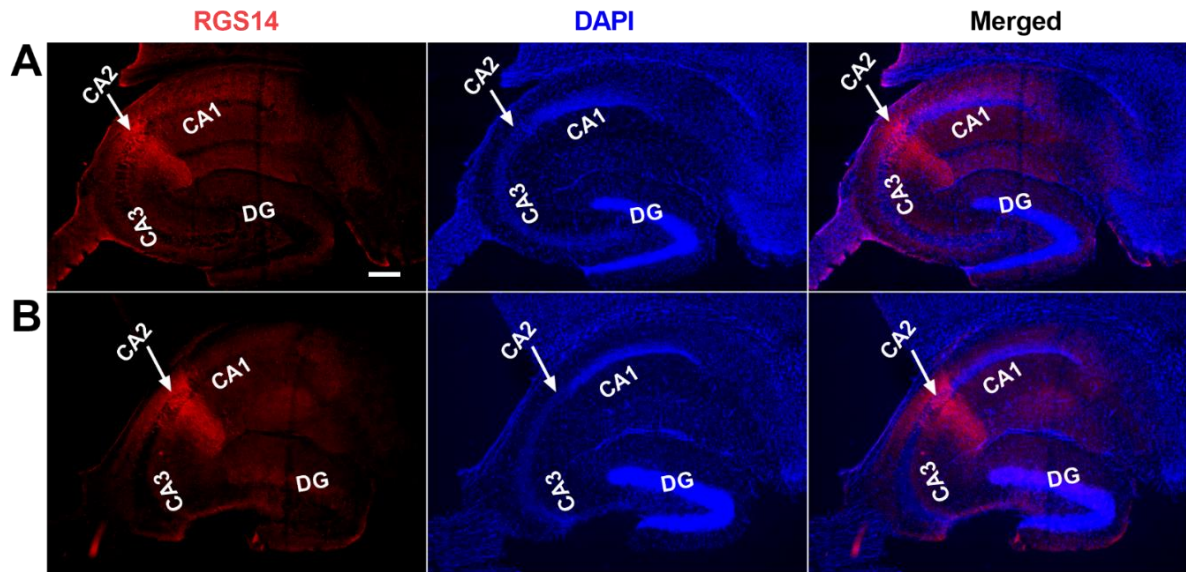

### Supplemental Figure S1. Immunostaining of RGS14 as a CA2 marker.

(A-B) Immunofluorescence of transversal hippocampal slices depicting RGS14 expression (red) concentrated in the CA2 region. Nuclei are labeled with DAPI (blue). The horizontal white line indicates a distance of 200 μm. RGS14 immunostaining enables delineation of the CA2 boundaries. In A) a hippocampal slice from *Uhrf*<sup>+/+</sup> and in B) from *Uhrf*<sup>-/-</sup> is depicted.

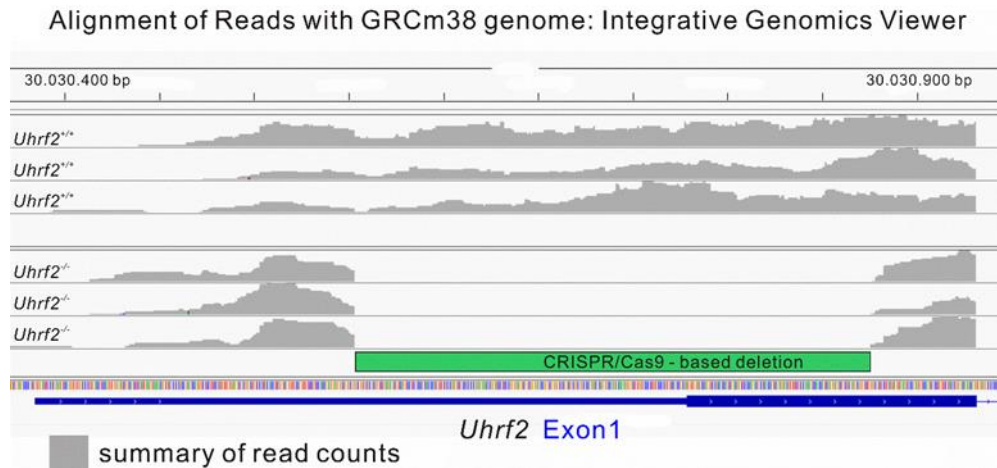

**Supplemental Figure S2. RNA sequencing confirms *Uhrf2* exon 1 modification.**

Analysis of RNA sequencing reads validates the anticipated deletion (green region) of *Uhrf2* exon 1 in *Uhrf2*<sup>-/-</sup> mice (n=3) relative to *Uhrf2*<sup>+/+</sup> wildtype littermate controls (n=3). The deletion of exon 1 sequences is evident in the *Uhrf2* knockouts.
